# Supplementary material for: New Fe2O3-Clay@C Nanocomposite Anodes for Li-Ion Batteries Obtained by Facile Hydrothermal Processes
Source: PubMed Central journal article supplement (PMC6215114; doi:10.3390/nano8100808), 2018-10-09
Supplement: nanomaterials-08-00808-s001.pdf [file nanomaterials-08-00808-s001.pdf]

## Supporting Information

# New Fe<sub>2</sub>O<sub>3</sub>-Clay@C nanocomposite anodes for Li-ion batteries obtained by facile hydrothermal processes.

Daniel Alonso-Domínguez<sup>1</sup>, María Pilar Pico <sup>2</sup>, Inmaculada Álvarez-Serrano<sup>1,\*</sup> and María Luisa López<sup>1</sup>

<sup>1</sup> Dpto. Química Inorgánica I, Facultad de Ciencias Químicas, Universidad Complutense de Madrid, avda. Complutense s/n, E-28040 Madrid, Spain, [danielad@quim.ucm.es](mailto:danielad@quim.ucm.es), [marisal@ucm.es](mailto:marisal@ucm.es)

<sup>2</sup> Sepiolsa, Avda. del Acero, 14-16, Pol. UP-1 (Miralcampo), 19200-Azuqueca de Henares, Guadalajara, Spain; [maria.pico@sepiolsa.com](mailto:maria.pico@sepiolsa.com)

\* Correspondence: [ias@ucm.es](mailto:ias@ucm.es); Tel.: +34-91-394-5237

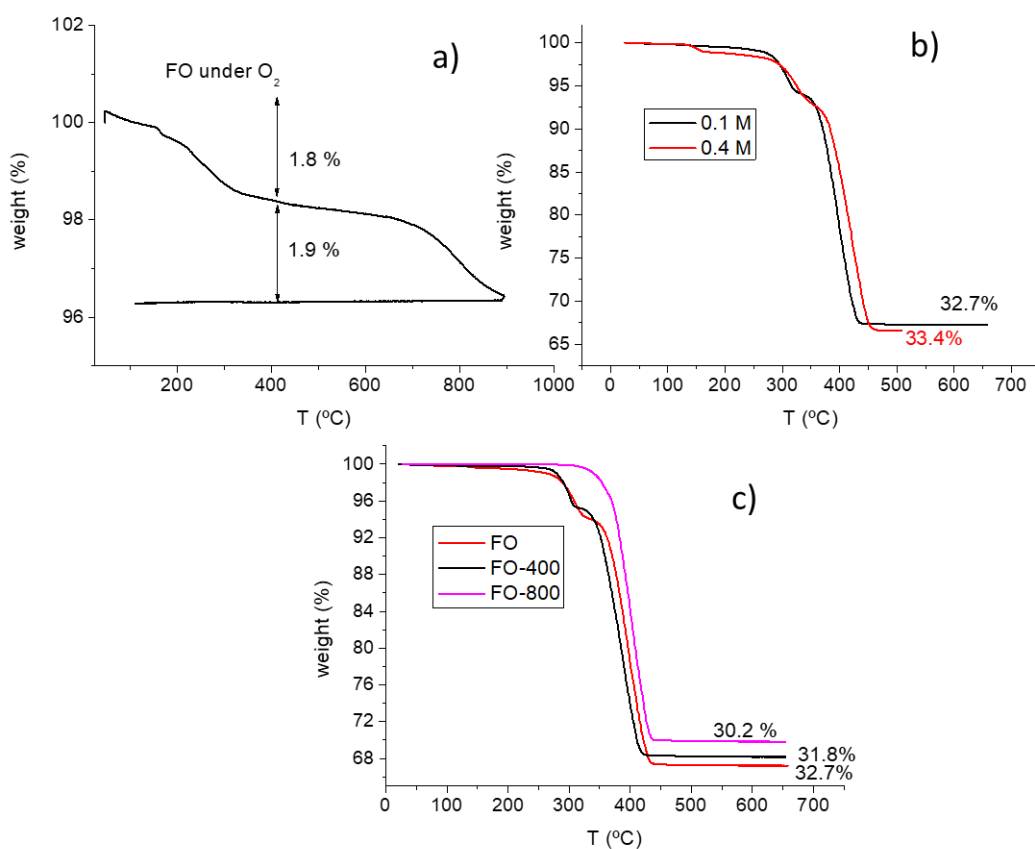

**Figure S1** TGA curves a) for FO samples under oxygen atmosphere; b) under H<sub>2</sub>:He (3:1) atmosphere for FO samples prepared from precursor solutions of different concentration and c) under H<sub>2</sub>:He (3:1) atmosphere FO samples obtained at different temperatures.

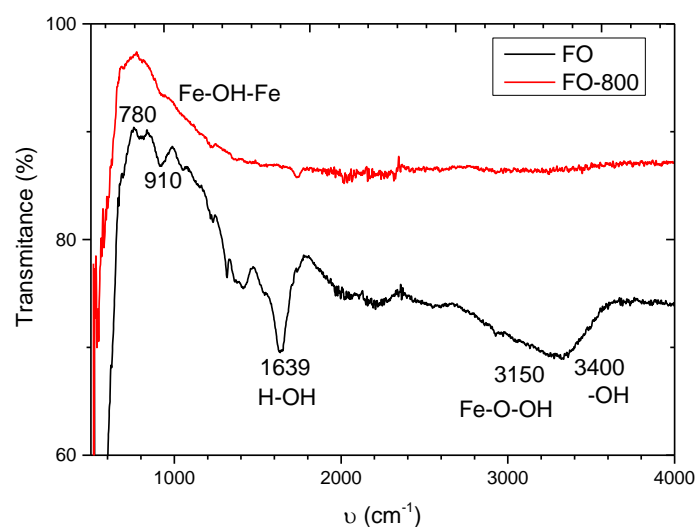

**Figure S2** FTIR spectra of FO and FO-800°C

The two peaks at 1639 and 3400  $\text{cm}^{-1}$  can be assigned to the vibration bending and stretching modes of O-H, indicating the presence of adsorbed water on the surface of the sample. The peaks at 780 and 910  $\text{cm}^{-1}$  can be related to the in-plane bending of surface hydroxyl groups, i.e. Fe-OH-Fe. In addition, the band at 3150  $\text{cm}^{-1}$  is related to the stretching mode of Fe-O-OH in  $\alpha$ -FeOOH. These bands disappear after the thermal treatment at 800°C. This is coherent with the TGA curve under oxygen atmosphere for the prepared iron oxide samples, which indicates that the FeOOH phase totally decomposes into hematite at that temperature (Figure S1a).

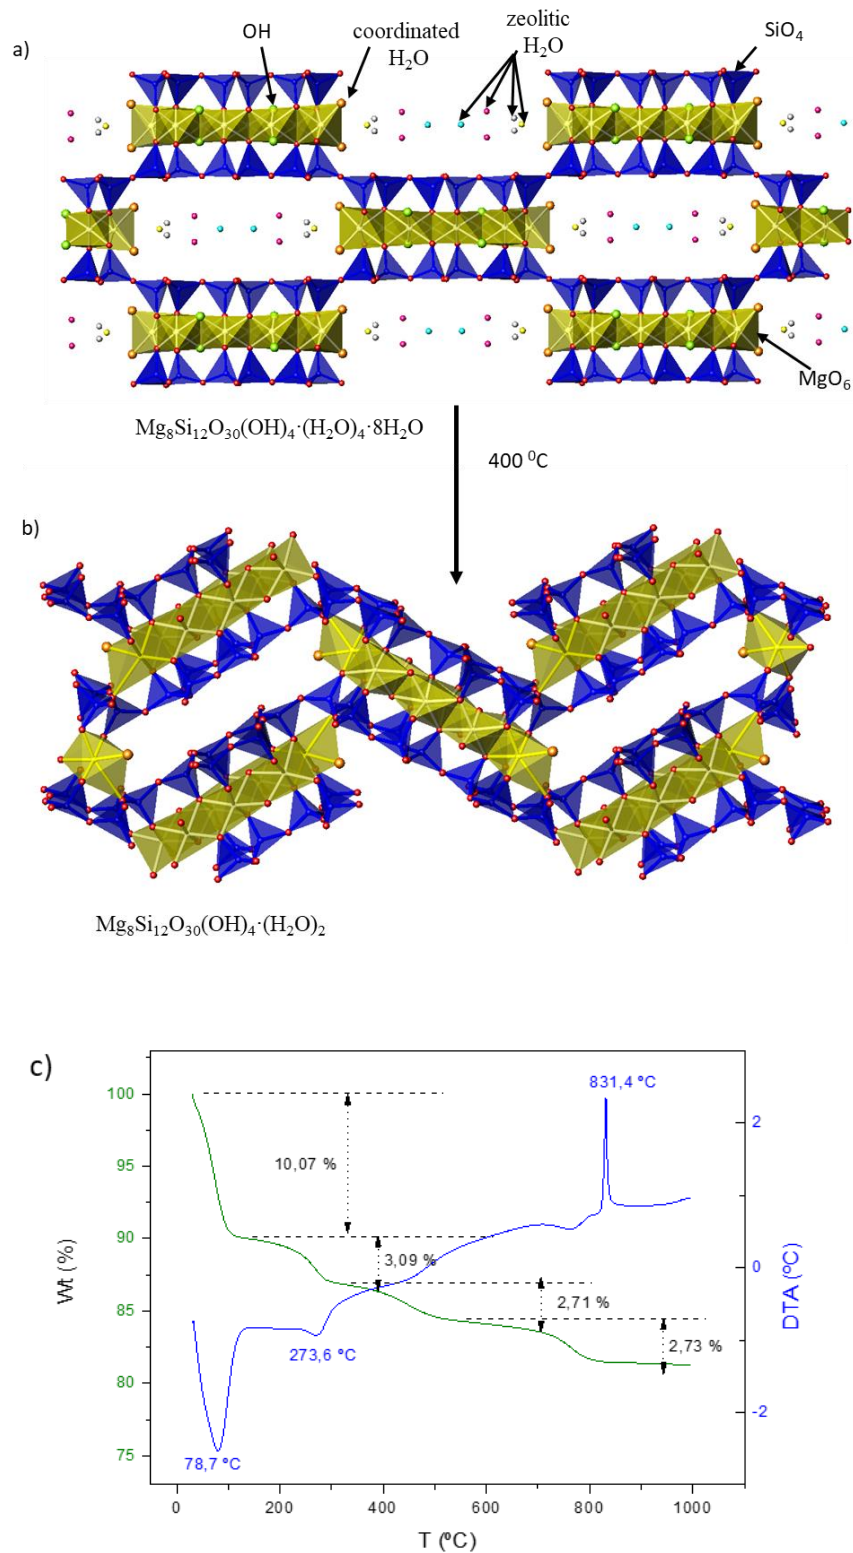

**Figure S3** Schemes of sepiolite structure a) before and b) after (dehydrated) thermal treatment; c) TGA and DTA curves of sepiolite.

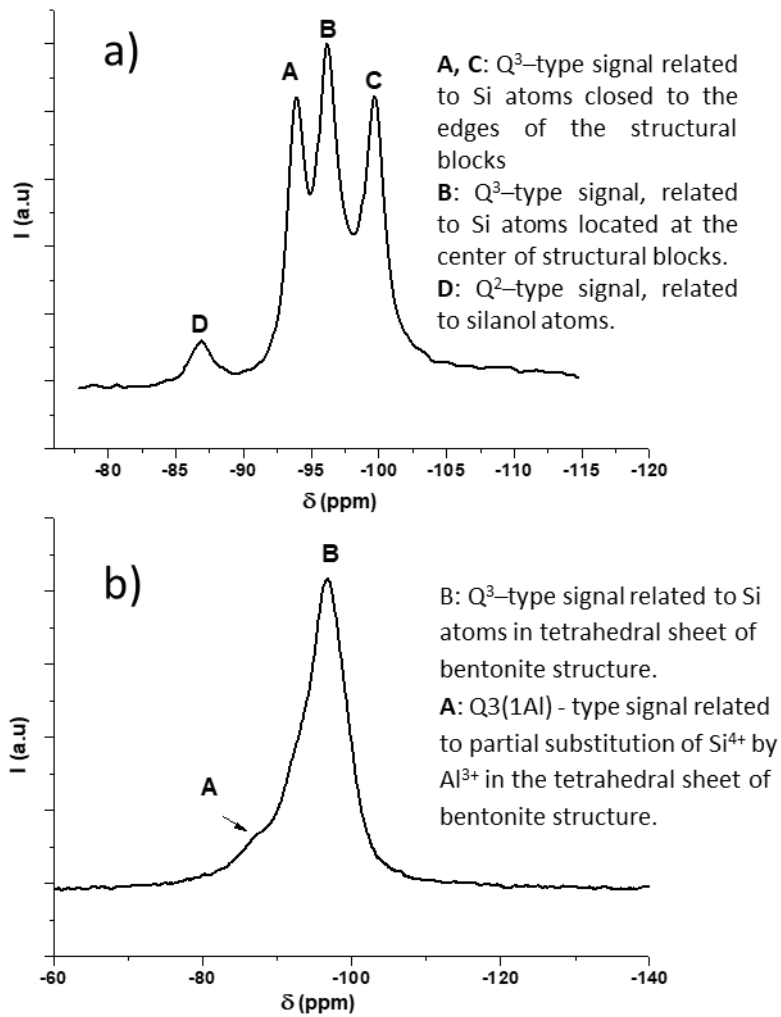

**Figure S4**  $^{29}\text{Si}$ -MAS-RMN spectra and bands assignments\* for the employed a) sepiolite and b) bentonite

\*For deeper insight about assignments see e.g. the following references:

-J.L. Valentín, M.A. López-Manchado, P. Posadas, A. Rodríguez, A. Marcos-Fernández, L. Ibarra, *J. Colloid Interface Sci.* **298** (2006) 794–804

- E. Pomakhina, D. Deneele, A. Gaillot, M. Paris, G. Ouvrard, *Cement and Concrete Research*, **42** (2012) 626–632.

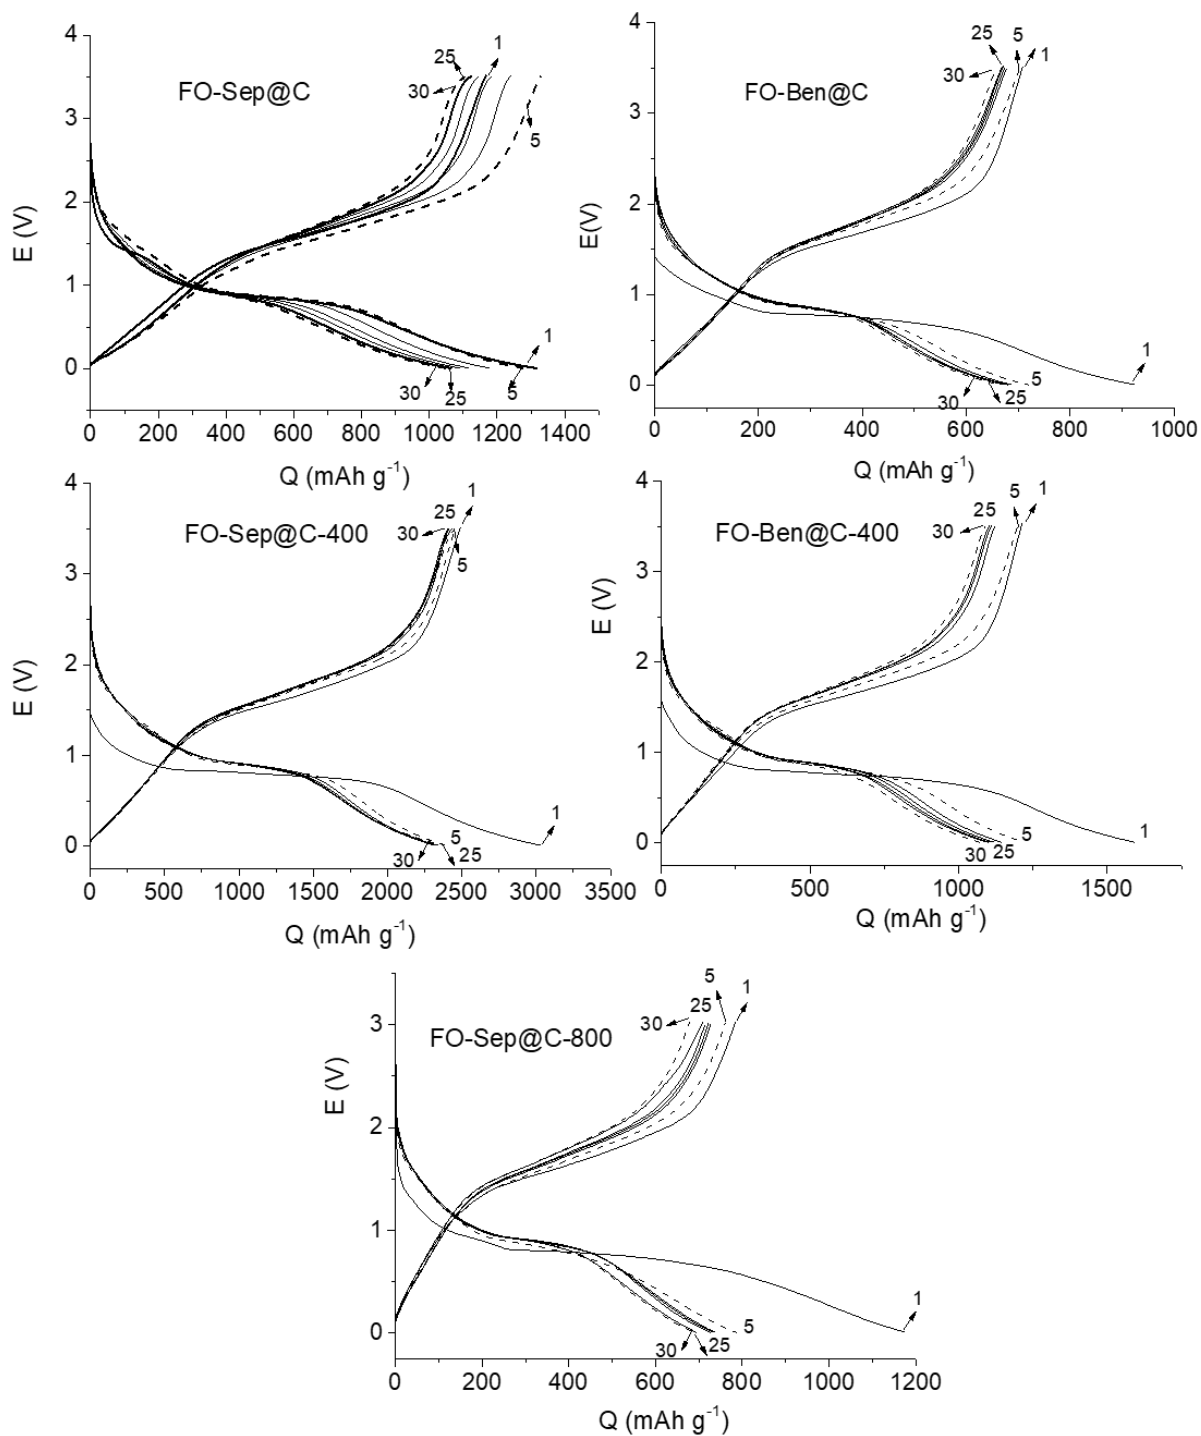

**Figure S5** Discharge-charge curves of of FO-Sep@C, FO-Ben@C, FO-Sep@C-400, FO-Ben@C-400 and of FO-Sep@C-800.
